# Supplementary material for: Habitat and seasonality shape the structure of tench (Tinca tinca L.) gut microbiome
Source: PubMed Central journal article supplement (PMC7064478; doi:10.1038/s41598-020-61351-1), 2020-03-10
Supplement: 41598_2020_61351_MOESM1_ESM.pdf [file 41598_2020_61351_MOESM1_ESM.pdf]

Habitat and seasonality shape the structure of tench (*Tinca tinca* L.) gut  
microbiome

Tomasz Dulski, Krzysztof Kozłowski, Sławomir Ciesielski

Table S1. Common and unique OTUs present in the four groups of tench.

| Groups     |                                                                      | Number of shared OTUs | Taxons                                                                                                                                         |
|------------|----------------------------------------------------------------------|-----------------------|------------------------------------------------------------------------------------------------------------------------------------------------|
| All groups | LakeAutumn2017<br>LakeSummer2018<br>PondAutumn2017<br>PondSummer2018 | 26                    | k__Bacteria; p__Firmicutes; c__Clostridia; o__Clostridiales; f__Clostridiaceae; g__Clostridium                                                 |
|            |                                                                      |                       | k__Bacteria; p__Firmicutes; c__Bacilli; o__Bacillales; f__Staphylococcaceae; g__Staphylococcus                                                 |
|            |                                                                      |                       | k__Bacteria; p__Firmicutes; c__Bacilli; o__Bacillales; f__Bacillaceae                                                                          |
|            |                                                                      |                       | k__Bacteria; p__Proteobacteria; c__Gammaproteobacteria; o__Aeromonadales; f__Aeromonadaceae; g__Aeromonas; s__caviae                           |
|            |                                                                      |                       | k__Bacteria; p__Firmicutes; c__Bacilli; o__Lactobacillales; f__Enterococcaceae                                                                 |
|            |                                                                      |                       | k__Bacteria; p__Proteobacteria; c__Betaproteobacteria                                                                                          |
|            |                                                                      |                       | k__Bacteria; p__Proteobacteria; c__Alphaproteobacteria; o__Rhizobiales                                                                         |
|            |                                                                      |                       | k__Bacteria; p__Proteobacteria; c__Betaproteobacteria; o__Rhodocyclales; f__Rhodocyclaceae                                                     |
|            |                                                                      |                       | k__Bacteria                                                                                                                                    |
|            |                                                                      |                       | k__Bacteria; p__Proteobacteria; c__Betaproteobacteria; o__Burkholderiales; f__Alcaligenaceae; g__Achromobacter; s__                            |
|            |                                                                      |                       | k__Bacteria; p__Firmicutes; c__Clostridia; o__Clostridiales; f__Clostridiaceae; g__Clostridium; s__gasigenes                                   |
|            |                                                                      |                       | k__Bacteria; p__Actinobacteria; c__Actinobacteria; o__Actinomycetales                                                                          |
|            |                                                                      |                       | k__Bacteria; p__Proteobacteria; c__Betaproteobacteria; o__Burkholderiales; f__Oxalobacteraceae; g__Polynucleobacter; s__                       |
|            |                                                                      |                       | k__Bacteria; p__Actinobacteria; c__Actinobacteria; o__Actinomycetales; f__Propionibacteriaceae; g__Propionibacterium; s__                      |
|            |                                                                      |                       | k__Bacteria; p__Proteobacteria; c__Betaproteobacteria; o__Burkholderiales; f__Comamonadaceae; g__Acidovorax                                    |
|            |                                                                      |                       | k__Bacteria; p__Proteobacteria; c__Gammaproteobacteria; o__Pseudomonadales; f__Pseudomonadaceae; g__Pseudomonas                                |
|            |                                                                      |                       | k__Bacteria; p__Proteobacteria; c__Gammaproteobacteria; o__Enterobacteriales; f__Enterobacteriaceae                                            |
|            |                                                                      |                       | k__Bacteria; p__Bacteroidetes                                                                                                                  |
|            |                                                                      |                       | k__Bacteria; p__Actinobacteria; c__Actinobacteria; o__Actinomycetales; f__Micrococcaceae; g__Micrococcus; s__                                  |
|            |                                                                      |                       | k__Bacteria; p__Firmicutes; c__Clostridia; o__Clostridiales; f__Peptostreptococcaceae; g__[Clostridium]; s__bifermentans                       |
|            |                                                                      |                       | k__Bacteria; p__Actinobacteria; c__Actinobacteria; o__Actinomycetales; f__Corynebacteriaceae; g__Corynebacterium; s__variable                  |
|            |                                                                      |                       | k__Bacteria; p__Fusobacteria; c__Fusobacteriia; o__Fusobacteriales; f__Fusobacteriaceae; g__u114; s__                                          |
|            |                                                                      |                       | k__Bacteria; p__Proteobacteria; c__Betaproteobacteria; o__Burkholderiales; f__Comamonadaceae                                                   |
|            |                                                                      |                       | k__Bacteria; p__Verrucomicrobia; c__[Spartobacteria]; o__[Chthoniobacteriales]; f__[Chthoniobacteraceae]; g__Candidatus Xiphinematobacter; s__ |
|            |                                                                      |                       | k__Bacteria; p__Proteobacteria; c__Betaproteobacteria; o__Neisseriales; f__Neisseriaceae; g__Eikenella; s__                                    |
|            |                                                                      |                       | k__Bacteria; p__Proteobacteria; c__Gammaproteobacteria; o__Aeromonadales; f__Aeromonadaceae; g__Tolumonas; s__                                 |

|                                                                                                                                         |                                                                                                       |                                                                                                                   |                                                                                                                                      |
|-----------------------------------------------------------------------------------------------------------------------------------------|-------------------------------------------------------------------------------------------------------|-------------------------------------------------------------------------------------------------------------------|--------------------------------------------------------------------------------------------------------------------------------------|
| From the same season                                                                                                                    | LakeAutumn2017<br>PondAutumn2017                                                                      | 14                                                                                                                | k__Bacteria; p__Firmicutes; c__Clostridia; o__Clostridiales; f__Veillonellaceae; g__Dialister; s__                                   |
|                                                                                                                                         | k__Bacteria; p__Actinobacteria; c__Actinobacteria; o__Actinomycetales; f__Geodermatophilaceae; g__s__ |                                                                                                                   |                                                                                                                                      |
| k__Bacteria; p__Firmicutes; c__Bacilli; o__Lactobacillales; f__Leuconostocaceae; g__Leuconostoc; s__                                    |                                                                                                       |                                                                                                                   |                                                                                                                                      |
| k__Bacteria; p__Bacteroidetes; c__Bacteroidia; o__Bacteroidales                                                                         |                                                                                                       |                                                                                                                   |                                                                                                                                      |
| k__Bacteria; p__Acidobacteria; c__Acidobacteria-6; o__s__f__s__                                                                         |                                                                                                       |                                                                                                                   |                                                                                                                                      |
| k__Bacteria; p__Proteobacteria; c__Betaproteobacteria; o__Neisseriales; f__Neisseriaceae                                                |                                                                                                       |                                                                                                                   |                                                                                                                                      |
| k__Bacteria; p__Firmicutes; c__Bacilli; o__Lactobacillales; f__Streptococcaceae; g__s__                                                 |                                                                                                       |                                                                                                                   |                                                                                                                                      |
| k__Bacteria; p__Firmicutes; c__Bacilli; o__Bacillales; f__Planococcaceae                                                                |                                                                                                       |                                                                                                                   |                                                                                                                                      |
| k__Bacteria; p__Proteobacteria; c__Gammaproteobacteria; o__Xanthomonadales; f__Xanthomonadaceae; g__Stenotrophomonas                    |                                                                                                       |                                                                                                                   |                                                                                                                                      |
| k__Bacteria; p__Proteobacteria; c__Epsilonproteobacteria; o__Campylobacteriales; f__Campylobacteraceae; g__Arcobacter; s__cryaerophilus |                                                                                                       |                                                                                                                   |                                                                                                                                      |
| k__Bacteria; p__Proteobacteria; c__Gammaproteobacteria; o__Alteromonadales; f__[Chromatiaceae]                                          |                                                                                                       |                                                                                                                   |                                                                                                                                      |
| k__Bacteria; p__Bacteroidetes; c__[Saprospirae]; o__[Saprospirales]; f__Chitinophagaceae; g__Flavihumibacter; s__                       |                                                                                                       |                                                                                                                   |                                                                                                                                      |
| k__Bacteria; p__Bacteroidetes; c__Bacteroidia; o__Bacteroidales; f__Prevotellaceae; g__Prevotella; s__copri                             |                                                                                                       |                                                                                                                   |                                                                                                                                      |
| k__Bacteria; p__Firmicutes; c__Bacilli; o__Lactobacillales; f__Lactobacillaceae; g__Lactobacillus                                       |                                                                                                       |                                                                                                                   |                                                                                                                                      |
| LakeSummer2018<br>PondSummer2018                                                                                                        | 2                                                                                                     | k__Bacteria; p__Proteobacteria; c__Gammaproteobacteria; o__Pasteurellales; f__Pasteurellaceae; g__Mannheimia; s__ |                                                                                                                                      |
| k__Bacteria; p__Proteobacteria; c__Betaproteobacteria; o__Neisseriales; f__Neisseriaceae; g__Chitinilyticum; s__aquatile                |                                                                                                       |                                                                                                                   |                                                                                                                                      |
| From the same environment                                                                                                               | PondAutumn2017<br>PondSummer2018                                                                      | 16                                                                                                                | k__Bacteria; p__Bacteroidetes; c__Flavobacteriia; o__Flavobacteriales; f__Flavobacteriaceae; g__Flavobacterium; s__frigidarium       |
|                                                                                                                                         |                                                                                                       |                                                                                                                   | k__Bacteria; p__Bacteroidetes; c__Flavobacteriia; o__Flavobacteriales; f__Flavobacteriaceae; g__Flavobacterium                       |
|                                                                                                                                         |                                                                                                       |                                                                                                                   | k__Bacteria; p__Firmicutes; c__Clostridia; o__Clostridiales; f__Veillonellaceae; g__Veillonella                                      |
|                                                                                                                                         |                                                                                                       |                                                                                                                   | k__Bacteria; p__Bacteroidetes; c__Flavobacteriia; o__Flavobacteriales; f__Cryomorphaceae                                             |
|                                                                                                                                         |                                                                                                       |                                                                                                                   | k__Bacteria; p__Bacteroidetes; c__Flavobacteriia; o__Flavobacteriales; f__Flavobacteriaceae; g__Flavobacterium; s__succinicans       |
|                                                                                                                                         |                                                                                                       |                                                                                                                   | k__Bacteria; p__Proteobacteria; c__Betaproteobacteria; o__Burkholderiales                                                            |
|                                                                                                                                         |                                                                                                       |                                                                                                                   | k__Bacteria; p__Proteobacteria; c__Alphaproteobacteria; o__Rhizobiales; f__Methylobacteriaceae; g__Methylobacterium; s__organophilum |
|                                                                                                                                         |                                                                                                       |                                                                                                                   | k__Bacteria; p__Cyanobacteria; c__Nostocophycideae; o__Nostocales; f__Nostocaceae; g__Cylindrospermopsis; s__                        |
|                                                                                                                                         |                                                                                                       |                                                                                                                   | k__Bacteria; p__Proteobacteria; c__Epsilonproteobacteria; o__Campylobacteriales; f__Campylobacteraceae; g__Arcobacter                |
|                                                                                                                                         |                                                                                                       |                                                                                                                   | k__Bacteria; p__Bacteroidetes; c__Cytophagia; o__Cytophagales                                                                        |
|                                                                                                                                         |                                                                                                       |                                                                                                                   | k__Bacteria; p__Proteobacteria; c__Gammaproteobacteria; o__Pseudomonadales; f__Moraxellaceae; g__Acinetobacter; s__guillouiae        |
|                                                                                                                                         |                                                                                                       |                                                                                                                   | k__Bacteria; p__Bacteroidetes; c__Flavobacteriia; o__Flavobacteriales; f__[Weeksellaceae]; g__Elizabethkingia; s__meningoseptica     |
|                                                                                                                                         |                                                                                                       |                                                                                                                   | k__Bacteria; p__Firmicutes; c__Bacilli; o__Lactobacillales                                                                           |
|                                                                                                                                         |                                                                                                       |                                                                                                                   | k__Bacteria; p__Proteobacteria; c__Alphaproteobacteria; o__Rhizobiales; f__Rhizobiaceae                                              |
|                                                                                                                                         |                                                                                                       |                                                                                                                   | k__Bacteria; p__Firmicutes; c__Clostridia; o__Clostridiales; f__Lachnospiraceae; g__Roseburia; s__faecis                             |
|                                                                                                                                         |                                                                                                       |                                                                                                                   | k__Bacteria; p__Proteobacteria; c__Betaproteobacteria; o__Neisseriales; f__Neisseriaceae; g__Vogesella; s__                          |

|                           |                                  |    |                                                                                                                                    |
|---------------------------|----------------------------------|----|------------------------------------------------------------------------------------------------------------------------------------|
| From the same environment | LakeAutumn2017<br>LakeSummer2018 | 29 | k__Bacteria; p__Proteobacteria; c__Alphaproteobacteria; o__Rhodobacterales;<br>f__Rhodobacteraceae                                 |
|                           |                                  |    | k__Bacteria; p__Verrucomicrobia; c__[Spartobacteria]; o__[Chthoniobacterales];<br>f__[Chthoniobacteraceae]; g__Chthoniobacter; s__ |
|                           |                                  |    | k__Bacteria; p__Proteobacteria; c__Gammaproteobacteria; o__Xanthomonadales;<br>f__Xanthomonadaceae                                 |
|                           |                                  |    | k__Bacteria; p__Proteobacteria; c__Gammaproteobacteria; o__Chromatiales                                                            |
|                           |                                  |    | k__Bacteria; p__Bacteroidetes; c__Flavobacteriia; o__Flavobacteriales;<br>f__Flavobacteriaceae; g__Lutimonas; s__                  |
|                           |                                  |    | k__Bacteria; p__Actinobacteria; c__Actinobacteria; o__Actinomycetales;<br>f__Nocardioideaceae; g__Pimelobacter; s__                |
|                           |                                  |    | k__Bacteria; p__Actinobacteria; c__Actinobacteria; o__Actinomycetales;<br>f__Mycobacteriaceae; g__Mycobacterium; s__celatum        |
|                           |                                  |    | k__Bacteria; p__Proteobacteria; c__Betaproteobacteria; o__Rhodocyclales;<br>f__Rhodocyclaceae; g__Azovibrio; s__                   |
|                           |                                  |    | k__Bacteria; p__Proteobacteria; c__Gammaproteobacteria; o__Chromatiales;<br>f__Chromatiaceae; g__Allochromatium; s__               |
|                           |                                  |    | k__Bacteria; p__Proteobacteria; c__Gammaproteobacteria; o__Methylococcales;<br>f__Crenotrichaceae; g__Crenothrix                   |
|                           |                                  |    | k__Bacteria; p__Proteobacteria; c__Deltaproteobacteria; o__Desulfobacterales;<br>f__Desulfobacteraceae                             |
|                           |                                  |    | k__Bacteria; p__Actinobacteria; c__Actinobacteria; o__Actinomycetales;<br>f__Intrasporangiaceae; g__Phycococcus; s__               |
|                           |                                  |    | k__Bacteria; p__Proteobacteria; c__Deltaproteobacteria; o__Desulfobacterales;<br>f__Desulfobulbaceae                               |
|                           |                                  |    | k__Bacteria; p__Proteobacteria; c__Deltaproteobacteria; o__Desulfobacterales;<br>f__Desulfobulbaceae; g__Desulfobulbus; s__        |
|                           |                                  |    | k__Bacteria; p__Proteobacteria; c__Gammaproteobacteria; o__Methylococcales;<br>f__Crenotrichaceae; g__Crenothrix; s__              |
|                           |                                  |    | k__Bacteria; p__Proteobacteria; c__Deltaproteobacteria; o__Syntrophobacterales;<br>f__Syntrophorhabdaceae; g__ ; s__               |
|                           |                                  |    | k__Bacteria; p__Verrucomicrobia; c__Verrucomicrobiae; o__Verrucomicrobiales;<br>f__Verrucomicrobiaceae; g__MSBL3; s__              |
|                           |                                  |    | k__Bacteria; p__Proteobacteria; c__Gammaproteobacteria; o__Methylococcales;<br>f__Crenotrichaceae; g__Crenothrix; s__polyspora     |
|                           |                                  |    | k__Bacteria; p__Planctomycetes; c__Planctomycetia; o__Pirellulales;<br>f__Pirellulaceae; g__planctomycete                          |
|                           |                                  |    | k__Bacteria; p__Bacteroidetes; c__Bacteroidia; o__Bacteroidales;<br>f__Porphyromonadaceae; g__Dysgonomonas; s__                    |
|                           |                                  |    | k__Bacteria; p__Actinobacteria                                                                                                     |
|                           |                                  |    | k__Bacteria; p__Proteobacteria                                                                                                     |
|                           |                                  |    | k__Bacteria; p__Proteobacteria; c__Gammaproteobacteria; o__Acidithiobacillales;<br>f__ ; g__ ; s__                                 |
|                           |                                  |    | k__Bacteria; p__Proteobacteria; c__Deltaproteobacteria; o__Desulfobacterales;<br>f__Desulfobulbaceae; g__Desulforhopalus; s__      |
|                           |                                  |    | k__Bacteria; p__Proteobacteria; c__Gammaproteobacteria; o__Pseudomonadales;<br>f__Pseudomonadaceae                                 |
|                           |                                  |    | k__Bacteria; p__Proteobacteria; c__Gammaproteobacteria; o__Enterobacteriales;<br>f__Enterobacteriaceae; g__Yersinia; s__           |
|                           |                                  |    | k__Bacteria; p__Proteobacteria; c__Gammaproteobacteria; o__Alteromonadales;<br>f__OM60; g__Congregibacter; s__                     |
|                           |                                  |    | k__Bacteria; p__Verrucomicrobia; c__[Methylacidiphilae]; o__Methylacidiphilales;<br>f__LD19; g__ ; s__                             |
|                           |                                  |    | k__Bacteria; p__Planctomycetes; c__Planctomycetia; o__Pirellulales;<br>f__Pirellulaceae; g__Pirellula; s__                         |

Table S2. Statistical analysis of mean relative abundance (%)  $\pm$  SD of phyla and genera between groups. Statistical Analysis of Metagenomics Profiles (STAMP) software was used to test statistical significance between groups abundances, unclassified reads were retained only for calculating frequency. One-Way ANOVA ( $P < 0.05$ ), with an effect size (ETA-Squared) with Benjamini-Hochberg FDR correction was applied followed by Tukey-Kramer post-hoc test.

| Phylum                              | Autumn 2017     |          |                  |          | Summer 2018       |          |                  |          | p-values<br>(corrected) | Effect size |
|-------------------------------------|-----------------|----------|------------------|----------|-------------------|----------|------------------|----------|-------------------------|-------------|
|                                     | Pond            |          | Lake             |          | Pond              |          | Lake             |          |                         |             |
|                                     | mean<br>abu.(%) | $\pm$ SD | mean<br>abu. (%) | $\pm$ SD | mean<br>abun. (%) | $\pm$ SD | mean abu.<br>(%) | $\pm$ SD |                         |             |
| <i>Verrucomicrobia</i>              | 0.32            | 0.59     | 1.92             | 2.26     | 0.28              | 0.62     | 2.91             | 1.60     | 0.02677                 | 0.42        |
| <i>Bacteroidetes</i>                | 8.70            | 5.22     | 3.94             | 2.34     | 8.81              | 8.35     | 0.73             | 1.09     | 0.13059                 | 0.31        |
| <i>Chloroflexi</i>                  | 0.00            | 0.00     | 0.25             | 0.34     | 0.00              | 0.00     | 0.00             | 0.00     | 0.10285                 | 0.31        |
| <i>Planctomycetes</i>               | 0.00            | 0.00     | 1.57             | 2.52     | 0.10              | 0.19     | 0.30             | 0.23     | 0.33806                 | 0.21        |
| <i>Firmicutes</i>                   | 16.57           | 10.10    | 21.72            | 20.47    | 7.86              | 12.92    | 5.65             | 7.43     | 0.37285                 | 0.19        |
| <i>Actinobacteria</i>               | 6.50            | 6.37     | 9.71             | 10.04    | 3.61              | 7.36     | 0.86             | 0.68     | 0.34879                 | 0.18        |
| <i>Proteobacteria</i>               | 66.41           | 19.12    | 57.61            | 29.13    | 74.74             | 24.16    | 83.49            | 11.14    | 0.41028                 | 0.16        |
| <i>Acidobacteria</i>                | 0.91            | 1.93     | 1.79             | 1.97     | 0.59              | 1.32     | 0.25             | 0.25     | 0.61478                 | 0.11        |
| <i>Synergistetes</i>                | 0.03            | 0.06     | 0.00             | 0.00     | 0.00              | 0.00     | 0.00             | 0.00     | 0.57378                 | 0.11        |
| <i>WS6</i>                          | 0.04            | 0.09     | 0.00             | 0.00     | 0.00              | 0.00     | 0.00             | 0.00     | 0.52162                 | 0.11        |
| <i>Tenericutes</i>                  | 0.00            | 0.00     | 0.00             | 0.00     | 0.07              | 0.18     | 0.00             | 0.00     | 0.58042                 | 0.09        |
| <i>Cyanobacteria</i>                | 0.09            | 0.19     | 0.09             | 0.18     | 0.42              | 1.00     | 0.39             | 0.20     | 0.65605                 | 0.07        |
| <i>Fusobacteria</i>                 | 0.36            | 0.62     | 0.30             | 0.42     | 2.80              | 7.02     | 1.49             | 2.48     | 0.66832                 | 0.06        |
| <b>Genus</b>                        |                 |          |                  |          |                   |          |                  |          |                         |             |
| <i>Methylobacterium</i>             | 38.88           | 19.08    | 0                | 0        | 0.09              | 0.24     | 0                | 0        | 0.00003                 | 0.76        |
| <i>Candidatus Xiphinematobacter</i> | 0.01            | 0.03     | 0.03             | 0.04     | 0.05              | 0.13     | 2.01             | 1.02     | 0.00007                 | 0.72        |
| <i>A17</i>                          | 0               | 0        | 0.15             | 0.14     | 0                 | 0        | 0                | 0        | 0.05071                 | 0.49        |
| <i>Desulfobulbus</i>                | 0               | 0        | 0.11             | 0.11     | 0                 | 0        | 0.18             | 0.14     | 0.05514                 | 0.46        |
| <i>MSBL3</i>                        | 0               | 0        | 0.05             | 0.08     | 0                 | 0        | 0.18             | 0.15     | 0.05505                 | 0.45        |
| <i>Phycococcus</i>                  | 0               | 0        | 0.13             | 0.13     | 0                 | 0        | 0.01             | 0.02     | 0.06289                 | 0.44        |
| <i>Aeromonas</i>                    | 10.05           | 14.86    | 17.38            | 17.71    | 47.93             | 38.14    | 62.61            | 18.94    | 0.07229                 | 0.43        |
| <i>Desulforhopalus</i>              | 0               | 0        | 1.87             | 1.9      | 0                 | 0        | 0.38             | 0.24     | 0.08472                 | 0.42        |
| <i>Yersinia</i>                     | 0               | 0        | 0.01             | 0.03     | 0                 | 0        | 0.35             | 0.37     | 0.14502                 | 0.38        |
| <i>Crenothrix</i>                   | 0               | 0        | 5.08             | 5.77     | 0                 | 0        | 0.59             | 0.51     | 0.15432                 | 0.37        |
| <i>Flavobacterium</i>               | 1.84            | 2.18     | 0                | 0        | 5.28              | 5.16     | 0.03             | 0.08     | 0.15226                 | 0.36        |
| <i>Congregibacter</i>               | 0               | 0        | 0.1              | 0.13     | 0                 | 0        | 0.31             | 0.32     | 0.15184                 | 0.35        |
| <i>Dysgonomonas</i>                 | 0               | 0        | 0.73             | 0.9      | 0                 | 0        | 0.01             | 0.02     | 0.1561                  | 0.35        |
| <i>C39</i>                          | 0               | 0        | 0                | 0        | 0.55              | 0.65     | 0                | 0        | 0.17437                 | 0.34        |
| <i>Tolumonas</i>                    | 0.06            | 0.14     | 0.14             | 0.27     | 0.54              | 0.53     | 0                | 0.01     | 0.17624                 | 0.33        |
| <i>Modestobacter</i>                | 0               | 0        | 0.27             | 0.35     | 0                 | 0        | 0                | 0        | 0.20247                 | 0.32        |
| <i>Allochromatium</i>               | 0               | 0        | 0.51             | 0.68     | 0                 | 0        | 0.03             | 0.05     | 0.21644                 | 0.31        |
| <i>Chthoniobacter</i>               | 0               | 0        | 0.31             | 0.41     | 0                 | 0        | 0.02             | 0.04     | 0.21327                 | 0.31        |
| <i>Paulinella</i>                   | 0               | 0        | 0                | 0        | 0                 | 0        | 0.14             | 0.19     | 0.2234                  | 0.3         |
| <i>Acidovorax</i>                   | 0.02            | 0.05     | 0.26             | 0.3      | 0.04              | 0.09     | 0                | 0.01     | 0.23668                 | 0.29        |

|                          |      |       |       |      |       |       |      |      |         |      |
|--------------------------|------|-------|-------|------|-------|-------|------|------|---------|------|
| <i>Lactobacillus</i>     | 0.52 | 0.59  | 0.21  | 0.42 | 0     | 0     | 0    | 0    | 0.26428 | 0.28 |
| <i>Propionibacterium</i> | 0.93 | 0.54  | 0.81  | 1.15 | 0.34  | 0.32  | 0.03 | 0.03 | 0.25333 | 0.28 |
| <i>Shewanella</i>        | 0    | 0     | 0.84  | 0.82 | 0     | 0.01  | 0.8  | 1.1  | 0.30064 | 0.26 |
| <i>Luteolibacter</i>     | 0    | 0     | 1.52  | 1.93 | 0.24  | 0.62  | 0.29 | 0.2  | 0.30448 | 0.26 |
| <i>Chitinibacter</i>     | 0    | 0     | 0.04  | 0.08 | 0.1   | 0.19  | 0.27 | 0.27 | 0.30303 | 0.26 |
| <i>Deefgea</i>           | 0    | 0     | 1.6   | 1.89 | 0.05  | 0.08  | 0.87 | 1.26 | 0.30532 | 0.26 |
| <i>Arenimonas</i>        | 0    | 0     | 0     | 0    | 0     | 0     | 0.04 | 0.06 | 0.34298 | 0.24 |
| <i>Streptococcus</i>     | 1.14 | 1.17  | 0     | 0    | 0.98  | 1.33  | 0.04 | 0.06 | 0.35122 | 0.24 |
| <i>planctomycete</i>     | 0    | 0     | 0.62  | 0.98 | 0     | 0     | 0.05 | 0.07 | 0.36173 | 0.24 |
| <i>[Clostridium]</i>     | 0.06 | 0.14  | 1.8   | 3.27 | 0.1   | 0.25  | 4.29 | 5.6  | 0.38117 | 0.23 |
| <i>Anaerococcus</i>      | 0.09 | 0.15  | 0     | 0    | 0     | 0     | 0    | 0    | 0.42719 | 0.22 |
| <i>Prevotella</i>        | 0.6  | 0.97  | 0.01  | 0.02 | 0     | 0     | 0    | 0    | 0.42028 | 0.22 |
| <i>Flaviumibacter</i>    | 0.85 | 1.37  | 0.08  | 0.15 | 0     | 0     | 0    | 0    | 0.4381  | 0.22 |
| <i>Mannheimia</i>        | 0    | 0     | 0     | 0    | 6.06  | 9.73  | 0.05 | 0.12 | 0.43764 | 0.22 |
| <i>Corynebacterium</i>   | 3.68 | 5.68  | 1.17  | 1.75 | 0.07  | 0.1   | 0.01 | 0.02 | 0.44198 | 0.21 |
| <i>Bacillus</i>          | 0.3  | 0.51  | 0     | 0    | 0     | 0     | 0    | 0    | 0.43602 | 0.21 |
| <i>Anaeromyxobacter</i>  | 0    | 0     | 0.57  | 1.02 | 0     | 0     | 0    | 0    | 0.4405  | 0.21 |
| <i>Clostridium</i>       | 0.46 | 0.97  | 4.47  | 6.86 | 0.67  | 1.22  | 0.29 | 0.19 | 0.4365  | 0.21 |
| <i>Rothia</i>            | 0.21 | 0.36  | 0     | 0    | 0     | 0     | 0    | 0    | 0.46391 | 0.2  |
| <i>Clostridium I</i>     | 0    | 0     | 0.19  | 0.35 | 0     | 0     | 0    | 0    | 0.4782  | 0.2  |
| <i>Pseudomonas</i>       | 7.78 | 13.38 | 0.76  | 0.8  | 0.4   | 0.46  | 0.14 | 0.13 | 0.52458 | 0.19 |
| <i>Haemophilus</i>       | 0.57 | 1.05  | 0     | 0    | 0     | 0     | 0    | 0    | 0.53372 | 0.18 |
| <i>Lutimonas</i>         | 0    | 0     | 1.09  | 1.92 | 0     | 0     | 0.41 | 0.56 | 0.55596 | 0.18 |
| <i>Xanthomonas</i>       | 0    | 0     | 0     | 0    | 0     | 0     | 0.02 | 0.04 | 0.57052 | 0.18 |
| <i>Veillonella</i>       | 0.21 | 0.33  | 0     | 0    | 0.08  | 0.14  | 0    | 0    | 0.56388 | 0.18 |
| <i>Achromobacter</i>     | 1.35 | 2.37  | 0     | 0    | 0.22  | 0.49  | 0.01 | 0.01 | 0.5649  | 0.17 |
| <i>Pelosinus</i>         | 0    | 0     | 0.14  | 0.29 | 0     | 0     | 0    | 0    | 0.57484 | 0.17 |
| <i>Geobacter</i>         | 0    | 0     | 0.08  | 0.16 | 0     | 0     | 0    | 0    | 0.54645 | 0.17 |
| <i>Salinibacterium</i>   | 0    | 0     | 0.19  | 0.38 | 0     | 0     | 0    | 0    | 0.53979 | 0.17 |
| <i>Neorickettsia</i>     | 0    | 0     | 0.3   | 0.6  | 0     | 0     | 0    | 0    | 0.53329 | 0.17 |
| <i>Cellulomonas</i>      | 0    | 0     | 0.05  | 0.11 | 0     | 0     | 0    | 0    | 0.52074 | 0.17 |
| <i>Solirubrobacter</i>   | 0    | 0     | 0.04  | 0.08 | 0     | 0     | 0    | 0    | 0.50877 | 0.17 |
| <i>Carnobacterium</i>    | 0    | 0     | 0.1   | 0.2  | 0     | 0     | 0    | 0    | 0.50299 | 0.17 |
| <i>Legionella</i>        | 0    | 0     | 0.09  | 0.18 | 0     | 0     | 0    | 0    | 0.49181 | 0.17 |
| <i>Aeromicrobium</i>     | 0    | 0     | 0.13  | 0.27 | 0     | 0     | 0    | 0    | 0.47594 | 0.17 |
| <i>Actinoplanes</i>      | 0    | 0     | 0.16  | 0.32 | 0     | 0     | 0    | 0    | 0.45632 | 0.17 |
| <i>Pirellula</i>         | 0    | 0     | 0.53  | 1.05 | 0     | 0     | 0    | 0.01 | 0.4554  | 0.17 |
| <i>Kocuria</i>           | 0    | 0     | 1.16  | 2.32 | 0.07  | 0.19  | 0    | 0    | 0.47582 | 0.16 |
| <i>Bacteroides</i>       | 1.34 | 1.74  | 0.46  | 0.9  | 0.45  | 1.17  | 0    | 0    | 0.48416 | 0.16 |
| <i>Cloacibacterium</i>   | 0    | 0     | 1.27  | 2.54 | 0.12  | 0.31  | 0    | 0    | 0.4857  | 0.16 |
| <i>Acinetobacter</i>     | 0.38 | 0.67  | 0     | 0    | 0.88  | 1.37  | 0.08 | 0.21 | 0.49159 | 0.16 |
| <i>Mycobacterium</i>     | 0    | 0     | 0.19  | 0.38 | 0     | 0     | 0.06 | 0.04 | 0.49067 | 0.16 |
| <i>Azovibrio</i>         | 0    | 0     | 0.12  | 0.24 | 0     | 0     | 0.02 | 0.03 | 0.49162 | 0.16 |
| <i>Rheinheimera</i>      | 0    | 0     | 0     | 0    | 0.27  | 0.53  | 0    | 0    | 0.48602 | 0.15 |
| <i>Eikenella</i>         | 0.44 | 1.09  | 11.77 | 23.5 | 10.04 | 12.94 | 0.42 | 0.5  | 0.48678 | 0.15 |
| <i>Pimelobacter</i>      | 0    | 0     | 0.28  | 0.57 | 0     | 0     | 0.04 | 0.11 | 0.48867 | 0.15 |

|                           |      |      |      |       |      |      |      |      |         |      |
|---------------------------|------|------|------|-------|------|------|------|------|---------|------|
| <i>Nostocoida</i>         | 0    | 0    | 0.08 | 0.15  | 0    | 0    | 0.03 | 0.04 | 0.50824 | 0.15 |
| <i>Pantoea</i>            | 0    | 0    | 1.27 | 2.55  | 0.35 | 0.57 | 0    | 0    | 0.50577 | 0.15 |
| <i>Micrococcus</i>        | 0.22 | 0.35 | 0.74 | 1.48  | 0.04 | 0.1  | 0.01 | 0.01 | 0.5243  | 0.14 |
| <i>Staphylococcus</i>     | 5.34 | 3.01 | 10.3 | 18.55 | 3.42 | 6.7  | 0.16 | 0.26 | 0.56351 | 0.13 |
| <i>u114</i>               | 0.01 | 0.02 | 0.3  | 0.42  | 0.19 | 0.48 | 1.32 | 2.51 | 0.57408 | 0.13 |
| <i>Elizabethkingia</i>    | 0.34 | 0.84 | 0.09 | 0.18  | 1.58 | 3.11 | 0    | 0    | 0.58422 | 0.13 |
| <i>Actinobacillus</i>     | 0.13 | 0.32 | 0.63 | 1.27  | 0.1  | 0.25 | 0    | 0    | 0.58626 | 0.13 |
| <i>Arcobacter</i>         | 0.11 | 0.18 | 0.12 | 0.24  | 0.03 | 0.07 | 0    | 0    | 0.62783 | 0.12 |
| <i>Paracoccus</i>         | 0    | 0    | 0.02 | 0.04  | 0.03 | 0.08 | 0.08 | 0.12 | 0.63202 | 0.12 |
| <i>Stenotrophomonas</i>   | 0.1  | 0.24 | 0.18 | 0.35  | 0    | 0    | 0    | 0    | 0.65154 | 0.12 |
| <i>Wandonia</i>           | 0    | 0    | 0    | 0     | 0.24 | 0.56 | 0    | 0    | 0.64972 | 0.12 |
| <i>Vogesella</i>          | 0.03 | 0.07 | 0    | 0     | 0.1  | 0.2  | 0    | 0    | 0.6557  | 0.11 |
| <i>Friedmanniella</i>     | 0    | 0    | 0.08 | 0.17  | 0.04 | 0.1  | 0    | 0    | 0.6656  | 0.11 |
| <i>Neisseria</i>          | 0.13 | 0.33 | 0    | 0     | 0    | 0    | 0    | 0    | 0.65271 | 0.11 |
| <i>Blastomonas</i>        | 0.03 | 0.08 | 0    | 0     | 0    | 0    | 0    | 0    | 0.64791 | 0.11 |
| <i>Allobaculum</i>        | 0.09 | 0.23 | 0    | 0     | 0    | 0    | 0    | 0    | 0.63852 | 0.11 |
| <i>Akkermansia</i>        | 0.25 | 0.6  | 0    | 0     | 0    | 0    | 0    | 0    | 0.6294  | 0.11 |
| <i>Pseudoxanthomonas</i>  | 0.52 | 1.27 | 0    | 0     | 0    | 0    | 0    | 0    | 0.62494 | 0.11 |
| <i>Sedimentibacter</i>    | 0.13 | 0.31 | 0    | 0     | 0    | 0    | 0    | 0    | 0.62053 | 0.11 |
| <i>Ruminococcus</i>       | 0.47 | 1.15 | 0    | 0     | 0    | 0    | 0    | 0    | 0.61619 | 0.11 |
| <i>Methylopila</i>        | 0.05 | 0.12 | 0    | 0     | 0    | 0    | 0    | 0    | 0.61192 | 0.11 |
| <i>Pedobacter</i>         | 0.12 | 0.29 | 0    | 0     | 0    | 0    | 0    | 0    | 0.6077  | 0.11 |
| <i>Oscillospira</i>       | 0.06 | 0.16 | 0    | 0     | 0    | 0    | 0    | 0    | 0.59943 | 0.11 |
| <i>Porphyromonas</i>      | 0.05 | 0.11 | 0    | 0     | 0    | 0    | 0    | 0    | 0.59538 | 0.11 |
| <i>rc4-4</i>              | 0.06 | 0.14 | 0    | 0     | 0    | 0    | 0    | 0    | 0.59138 | 0.11 |
| <i>HA73</i>               | 0.03 | 0.06 | 0    | 0     | 0    | 0    | 0    | 0    | 0.58744 | 0.11 |
| <i>Parabacteroides</i>    | 0.53 | 1.29 | 0    | 0     | 0    | 0    | 0    | 0    | 0.58355 | 0.11 |
| <i>Blautia</i>            | 0.05 | 0.13 | 0    | 0     | 0    | 0    | 0    | 0    | 0.57218 | 0.11 |
| <i>Selenomonas</i>        | 0.11 | 0.26 | 0    | 0     | 0    | 0    | 0    | 0    | 0.56849 | 0.11 |
| <i>Bilophila</i>          | 0.14 | 0.35 | 0    | 0     | 0    | 0    | 0    | 0    | 0.56485 | 0.11 |
| <i>02d06</i>              | 0.06 | 0.15 | 0    | 0     | 0    | 0    | 0    | 0    | 0.55419 | 0.11 |
| <i>Syntrophus</i>         | 0.1  | 0.25 | 0    | 0     | 0    | 0    | 0    | 0    | 0.55072 | 0.11 |
| <i>Peptoniphilus</i>      | 0.04 | 0.1  | 0    | 0     | 0    | 0    | 0    | 0    | 0.5473  | 0.11 |
| <i>Actinomyces</i>        | 0.06 | 0.14 | 0    | 0     | 0    | 0    | 0    | 0    | 0.53404 | 0.11 |
| <i>[Prevotella]</i>       | 0.13 | 0.32 | 0    | 0     | 0    | 0    | 0    | 0    | 0.53082 | 0.11 |
| <i>Clostridium 2</i>      | 0.35 | 0.86 | 0    | 0     | 0    | 0    | 0    | 0    | 0.52764 | 0.11 |
| <i>Polynucleobacter</i>   | 0.63 | 0.98 | 0.01 | 0.03  | 0.85 | 1.79 | 0    | 0    | 0.52573 | 0.11 |
| <i>Dialister</i>          | 0.38 | 0.94 | 0.02 | 0.02  | 0    | 0    | 0    | 0    | 0.53187 | 0.11 |
| <i>Leuconostoc</i>        | 0.23 | 0.55 | 0.01 | 0.02  | 0    | 0    | 0    | 0    | 0.53114 | 0.11 |
| <i>Cylindrospermopsis</i> | 0.09 | 0.19 | 0    | 0     | 0.02 | 0.05 | 0    | 0    | 0.54514 | 0.11 |
| <i>Enhydrobacter</i>      | 0.09 | 0.23 | 0.11 | 0.23  | 0    | 0    | 0    | 0.01 | 0.56204 | 0.1  |
| <i>Lactococcus</i>        | 0.37 | 0.89 | 0.74 | 1.48  | 0.15 | 0.24 | 0    | 0    | 0.56079 | 0.1  |
| <i>Roseburia</i>          | 0.04 | 0.09 | 0    | 0     | 0.01 | 0.02 | 0    | 0    | 0.57372 | 0.1  |
| <i>Dyadobacter</i>        | 0    | 0    | 0    | 0     | 0.04 | 0.12 | 0    | 0    | 0.59095 | 0.09 |
| <i>Alistipes</i>          | 0    | 0    | 0    | 0     | 0.07 | 0.19 | 0    | 0    | 0.58771 | 0.09 |
| <i>Roseococcus</i>        | 0    | 0    | 0    | 0     | 0.32 | 0.84 | 0    | 0    | 0.5845  | 0.09 |

|                                |      |      |      |      |      |      |      |      |         |      |
|--------------------------------|------|------|------|------|------|------|------|------|---------|------|
| <i>Flectobacillus</i>          | 0    | 0    | 0    | 0    | 0.14 | 0.37 | 0    | 0    | 0.58132 | 0.09 |
| <i>Candidatus Hamiltonella</i> | 0    | 0    | 0    | 0    | 0.22 | 0.59 | 0    | 0    | 0.57199 | 0.09 |
| <i>Sulfurospirillum</i>        | 0    | 0    | 0    | 0    | 0.07 | 0.2  | 0    | 0    | 0.56895 | 0.09 |
| <i>Aquabacterium</i>           | 0    | 0    | 0    | 0    | 0    | 0    | 0.01 | 0.02 | 0.56296 | 0.09 |
| <i>Serratia</i>                | 0    | 0    | 0    | 0    | 0    | 0    | 0.07 | 0.19 | 0.5571  | 0.09 |
| <i>Peredibacter</i>            | 0    | 0    | 0    | 0    | 0.03 | 0.08 | 0    | 0    | 0.55135 | 0.09 |
| <i>Cetobacterium</i>           | 0.35 | 0.62 | 0    | 0    | 2.61 | 6.53 | 0.17 | 0.13 | 0.55328 | 0.09 |
| <i>Morganella</i>              | 0.01 | 0.02 | 0    | 0    | 0    | 0    | 0.16 | 0.42 | 0.55447 | 0.09 |
| <i>Sediminibacterium</i>       | 0.51 | 1.24 | 0.01 | 0.01 | 0.19 | 0.39 | 0    | 0    | 0.55805 | 0.09 |
| <i>Chitinilyticum</i>          | 0    | 0    | 0    | 0    | 0.02 | 0.04 | 0.02 | 0.04 | 0.56265 | 0.09 |
| <i>Enterococcus</i>            | 0    | 0    | 0.02 | 0.05 | 0.06 | 0.17 | 0    | 0    | 0.57218 | 0.08 |
| <i>Desulfovibrio</i>           | 0    | 0    | 0    | 0    | 0.33 | 0.87 | 0.16 | 0.18 | 0.59531 | 0.08 |
| <i>Methylocaldum</i>           | 0    | 0    | 0.33 | 0.58 | 0.64 | 1.6  | 0.36 | 0.32 | 0.67444 | 0.06 |
